# Supplementary material for: Identification and Molecular Characterization of Giant Liver Fluke (Fascioloides magna) Infection in European Fallow Deer (Dama dama) in Romania—First Report
Source: MDPI journal article supplement (doi:10.3390/microorganisms12030527), 2024-03-06
Supplement: s1 [file s1]

Tree scale: 0.1

AB553816 *Fasciola hepatica* /Ovis aries/ Egypt  
AB553823 *Fasciola hepatica*/Bubalus bubalis/Egypt  
MN970006 *Fasciola jacksoni*/Elephant/ Sri Lanka  
MT909821 *Fasciola nyanzae*/ Hippopotamus amphibius/ Zimbabwe  
MT429174 *Fasciola gigantica*/ Bovine/Viet Nam  
MT429177 *Fasciola gigantica*/ Buffalo/ Viet Nam  
KU232369 *Fascioloides magna*/ Bos taurus/USA  
EF051080 *Fascioloides magna*/ Fallow deer (*Dama dama*)/USA  
EF612487 *Fascioloides magna*/ USA  
DQ683545 *Fascioloides magna*/ Austria  
EF534992 *Fascioloides magna*/ Cervus elaphus (red deer)/Slovakia  
OQ689976 *Fascioloides magna*/ Fallow deer (*Dama dama*)/ Romania

File: 489\_P5 Run Ended: 2022-12-19 23:40:56 Signal G:1636 A:2506 C:4868 T:5743  
Sample: 489\_P5 Lane: 7 Base spacing: 16.006731 687 bases in 20541 scans Page 1 of 2

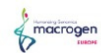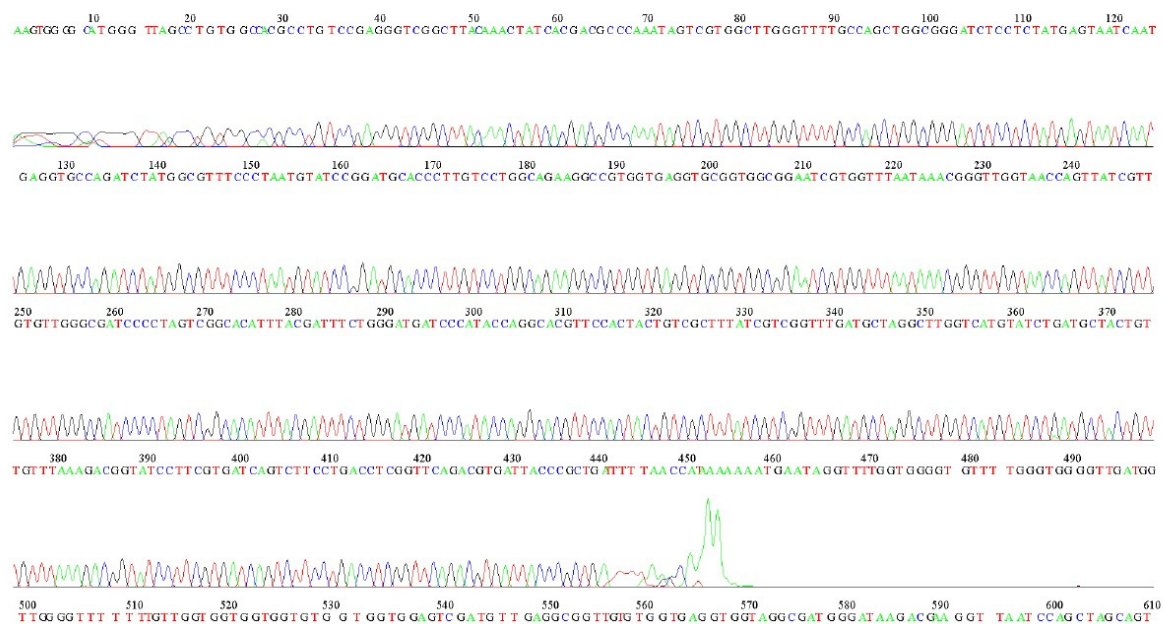

## Supplementary Figure S3

File: 490\_P6 Run Ended: 2022-12-19 23:40:56 Signal G:1761 A:3229 C:4173 T:2708  
Sample: 490\_P6 Lane: 5 Base spacing: 16.005156 1381 bases in 23853 scans Page 1 of 2

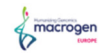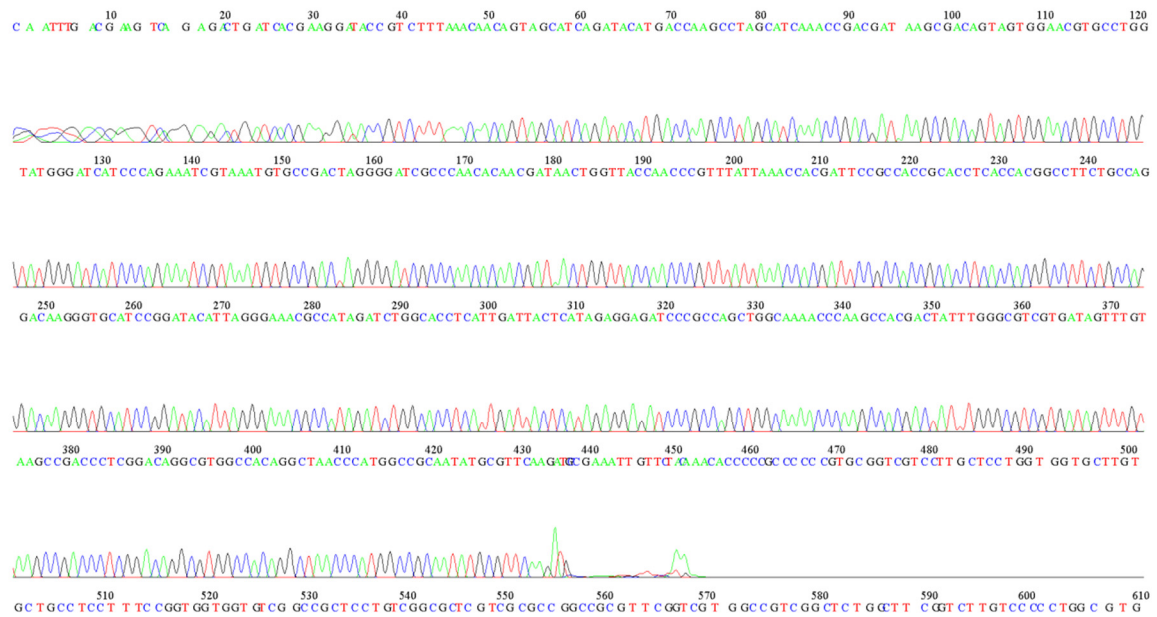

## Supplementary Figure S4

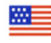

An official website of the United States government

[Here's how you know](#)

Nucleotide ▼

GenBank

### **Fascioloides magna isolate RO\_489\_FM 5.8S ribosomal RNA gene, partial sequence; internal transcribed spacer 2, complete sequence; and large subunit ribosomal RNA gene, partial sequence**

GenBank: OQ689976.1

[FASTA](#) [Graphics](#)

[Go to:](#)

```
LOCUS      OQ689976                428 bp    DNA        linear    INV 29-MAR-2023
DEFINITION Fascioloides magna isolate RO_489_FM 5.8S ribosomal RNA gene,
partial sequence; internal transcribed spacer 2, complete sequence;
and large subunit ribosomal RNA gene, partial sequence.
ACCESSION  OQ689976
VERSION    OQ689976.1
KEYWORDS   .
SOURCE     Fascioloides magna
  ORGANISM Fascioloides magna
            Eukaryota; Metazoa; Spiralia; Lophotrochozoa; Platyhelminthes;
            Trematoda; Digenea; Plagiorchiida; Echinostomata;
            Echinostomatoidea; Fasciolidae; Fascioloides.
REFERENCE  1 (bases 1 to 428)
  AUTHORS  Imre,M. and Mederle,N.
  TITLE    First report of Fascioloides magna in fallow deer in Romania
  JOURNAL  Unpublished
REFERENCE  2 (bases 1 to 428)
  AUTHORS  Imre,M. and Mederle,N.
  TITLE    Direct Submission
  JOURNAL  Submitted (24-MAR-2023) Parasitology and Parasitic Disease
            Department, University of Life Sciences Timisoara, Timisoara, Calea
            Aradului No. 119, Timisoara, Timis 300645, Romania
COMMENT    ##Assembly-Data-START##
            Sequencing Technology :: Sanger dideoxy sequencing
            ##Assembly-Data-END##
FEATURES   Location/Qualifiers
     source          1..428
                     /organism="Fascioloides magna"
                     /mol_type="genomic DNA"
                     /isolate="RO_489_FM"
                     /isolation_source="liver"
                     /host="Dama dama"
                     /db_xref="taxon:394415"
                     /country="Romania"
                     /collection_date="12-Nov-2022"
     misc_RNA        <1..>428
                     /note="contains 5.8S ribosomal RNA, internal transcribed
                     spacer 2, and large subunit ribosomal RNA"
ORIGIN
1 tagcctgtgg ccacgcctgt ccgagggtcg gcttacaaac tatcacgacg cccaaatagt
61 cgtggcttgg gttttgccag ctggcgggat ctctctatg agtaatcaat gaggtgccag
121 atctatggcg ttccctaata gtatccggat gcacccttgt cctggcagaa ggccgtgggtg
181 aggtcgggtg gcggaatcgt ggtttaataa acgggttggt aaccagttat cgttgtgttg
241 ggcgatcccc tagtcggcac atttacgatt tctgggatga tcccatacca ggcacgttcc
301 actactgtcg ctttatcgtc ggtttgatgc taggcttggt catgtatctg atgctactgt
361 tgtttaaaga cggatccctt cgtgatcagt cttcctgacc tcggttcaga cgtgattacc
421 cgctgatt
//
```
